# Supplementary material for: Two Biogenic Volatile Organic Compound Emission Datasets over Europe Based on Land Surface Modelling and Satellite Data Assimilation
Source: Copernicus journal article supplement (doi:10.5194/essd-2025-442), 2025-10-02
Supplement: Supplementary file 1 [file essd-2025-442-supplement.pdf]

**Table S1. List of VOCs and their three-letter abbreviation included in the SURFEX-MEGAN3.0 datasets.**

| RACM name/three-letter abbreviation | Long explanation of chemical species according to RACM definitions                                                                                                                                       |
|-------------------------------------|----------------------------------------------------------------------------------------------------------------------------------------------------------------------------------------------------------|
| ISO                                 | Isoprene                                                                                                                                                                                                 |
| CH4                                 | Methane                                                                                                                                                                                                  |
| ETH                                 | Ethane                                                                                                                                                                                                   |
| HC3                                 | Sum of alkanes, alcohols, esters, and alkynes with OH rate constant (298K, 1 atmosphere) less than $3.4 \times 10^{-12} \text{ cm}^3 \text{ s}^{-1}$                                                     |
| HC5                                 | Sum of alkanes, alcohols, esters, and alkynes with OH rate constant (298K, 1 atmosphere) between $3.4 \times 10^{-12} \text{ cm}^3 \text{ s}^{-1}$ and $6.8 \times 10^{-12} \text{ cm}^3 \text{ s}^{-1}$ |
| HC8                                 | Sum of alkanes, alcohols, esters, and alkynes with OH rate constant (298K, 1 atmosphere) greater than $6.8 \times 10^{-12} \text{ cm}^3 \text{ s}^{-1}$                                                  |
| OL2                                 | Ethene                                                                                                                                                                                                   |
| OLI                                 | Sum of internal alkenes                                                                                                                                                                                  |
| OLT                                 | Sum of terminal alkenes                                                                                                                                                                                  |
| ALD                                 | Sum of acetaldehyde and higher aldehydes                                                                                                                                                                 |
| KET                                 | Sum of ketones                                                                                                                                                                                           |
| TOL                                 | Sum of toluene and less reactive aromatics                                                                                                                                                               |
| HCHO                                | Formaldehyde                                                                                                                                                                                             |
| ORA1                                | Formic acid                                                                                                                                                                                              |
| ORA2                                | Sum of acetic acid and higher acids                                                                                                                                                                      |
| API                                 | Sum of alpha-pinene and other cyclic terpenes with one double bond                                                                                                                                       |
| LIM                                 | Sum of limonenes and other cyclic diene-terpenes                                                                                                                                                         |

## Monthly Mean Isoprene Emissions Over the CAMS European Domain for 2018 - Open Loop

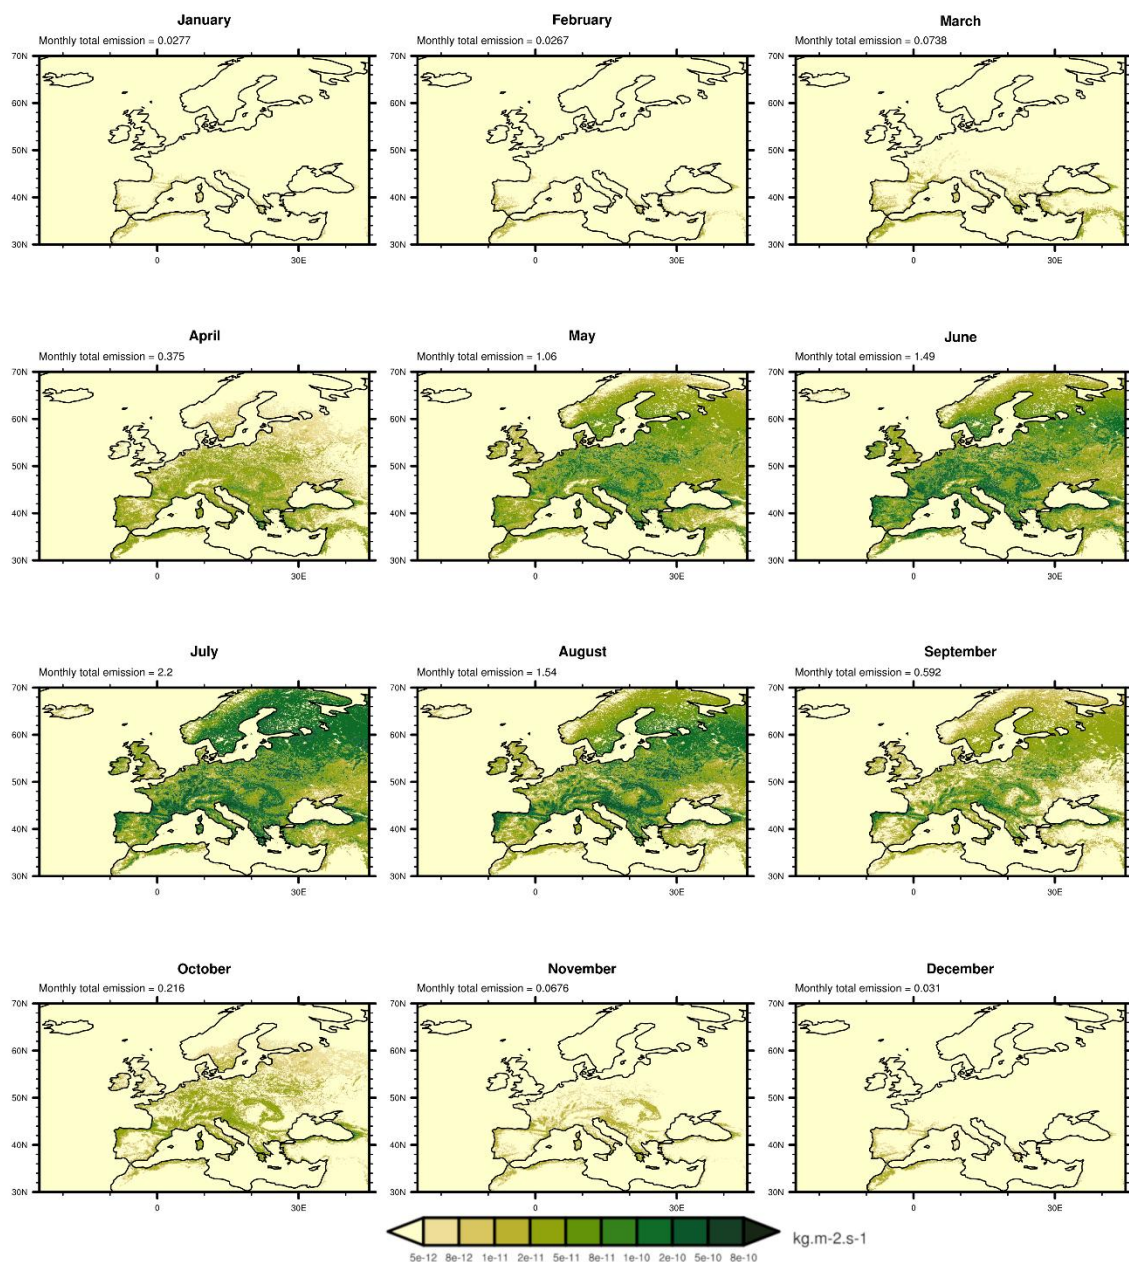

**Figure S1.** Maps of monthly mean isoprene emissions (units of  $\text{kg.m}^{-2}.\text{s}^{-1}$ ) calculated using the SURFEX-MEGAN3.0 algorithms and averaged over 2018 using the open-loop configuration of SURFEX. The panels show each month moving sequentially from January to December first from left to right and then downwards from top to bottom. The colour bars indicate increasing mean isoprene emissions as the colours transition from pale yellow to dark green. Note that the colour bar has a quasi-logarithmic scale. The monthly total mass of isoprene emissions (units of Tg) are shown above each plot.

## Monthly Mean Isoprene Emissions Over the CAMS European Domain for 2019 - Open Loop

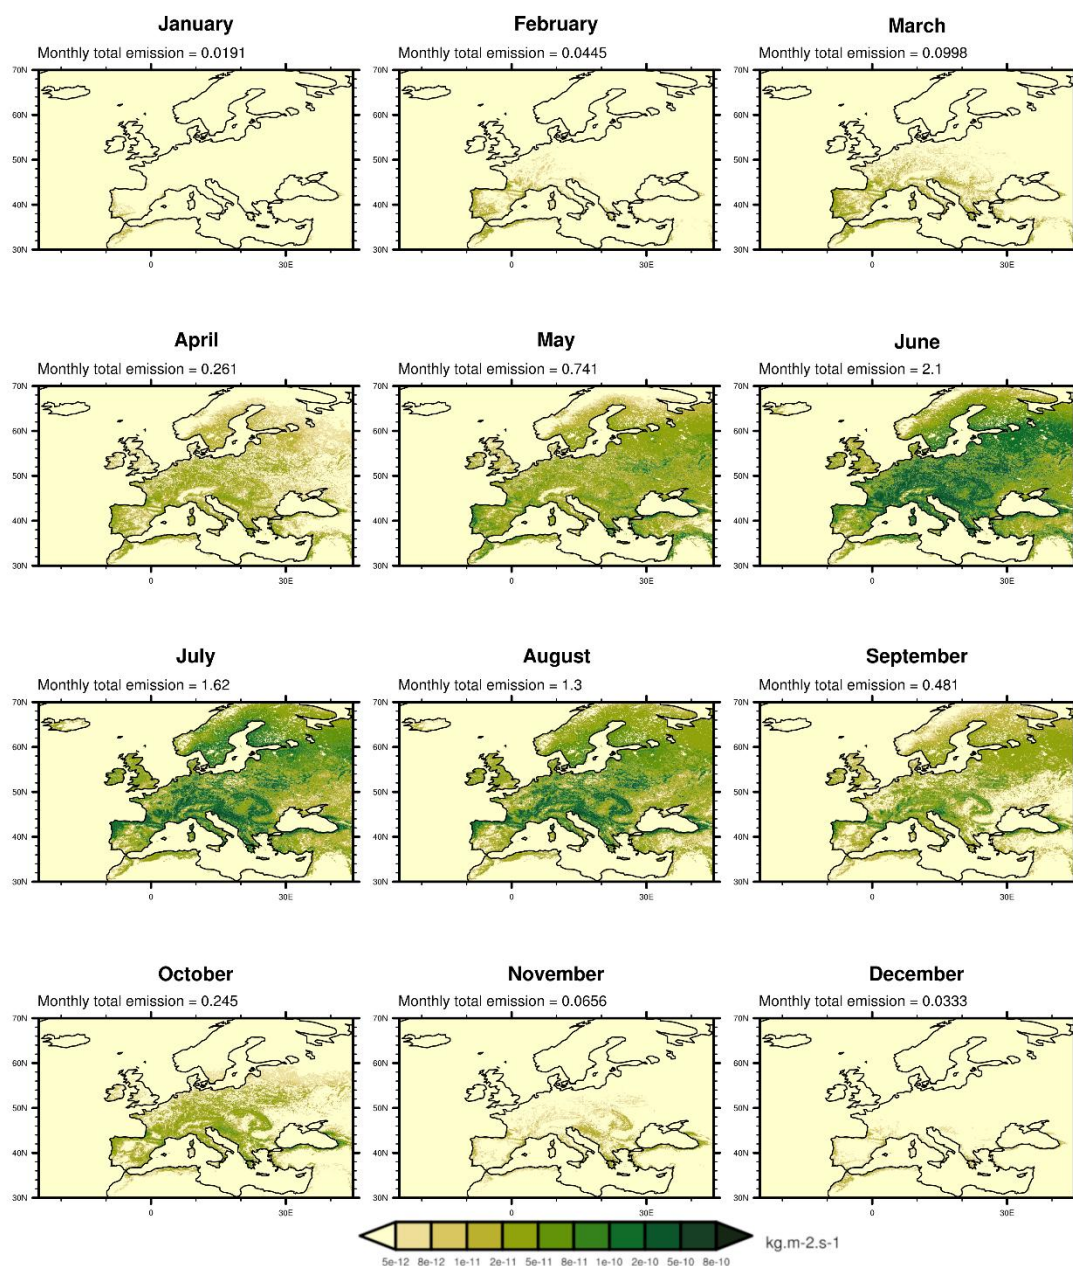

**Figure S2.** Maps of monthly mean isoprene emissions (units of  $\text{kg.m}^{-2}.\text{s}^{-1}$ ) calculated using the SURFEX-MEGAN3.0 algorithms and averaged over 2019 using the open-loop configuration of SURFEX. The panels show each month moving sequentially from January to December first from left to right and then downwards from top to bottom. The colour bars indicate increasing mean isoprene emissions as the colours transition from pale yellow to dark green. Note that the colour bar has a quasi-logarithmic scale. The monthly total mass of isoprene emissions (units of Tg) are shown above each plot.

## Monthly Mean Isoprene Emissions Over the CAMS European Domain for 2020 - Open Loop

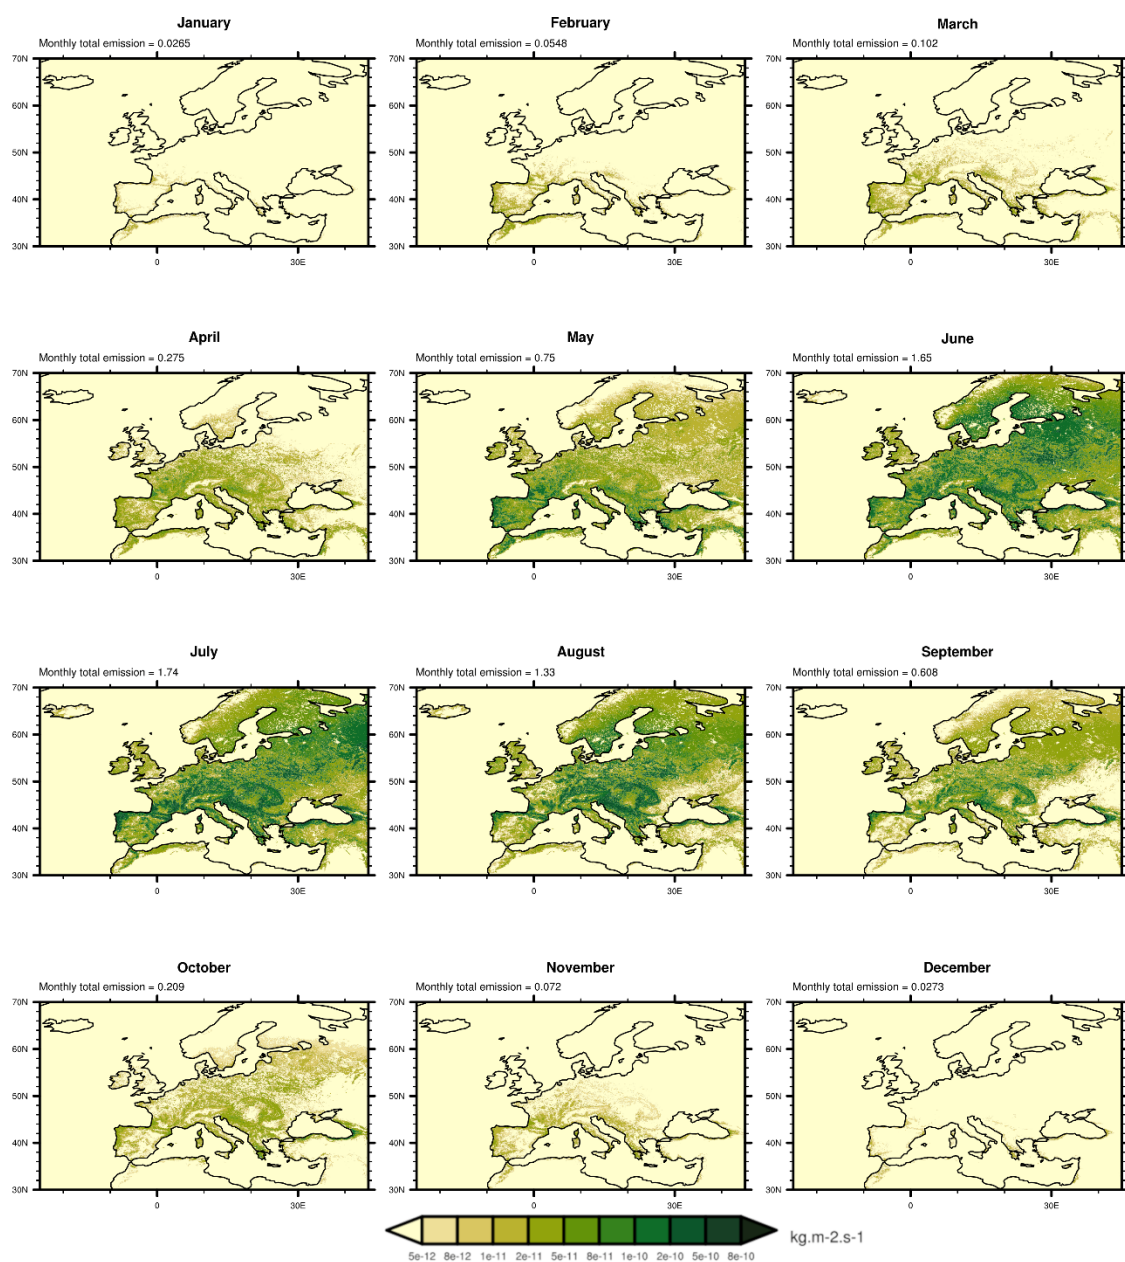

**Figure S3.** Maps of monthly mean isoprene emissions (units of  $\text{kg.m}^{-2}.\text{s}^{-1}$ ) calculated using the SURFEX-MEGAN3.0 algorithms and averaged over 2020 using the open-loop configuration of SURFEX. The panels show each month moving sequentially from January to December first from left to right and then downwards from top to bottom. The colour bars indicate increasing mean isoprene emissions as the colours transition from pale yellow to dark green. Note that the colour bar has a quasi-logarithmic scale. The monthly total mass of isoprene emissions (units of  $\text{Tg}$ ) are shown above each plot.



## Monthly Mean Isoprene Emissions Over the CAMS European Domain for 2021 - Open Loop

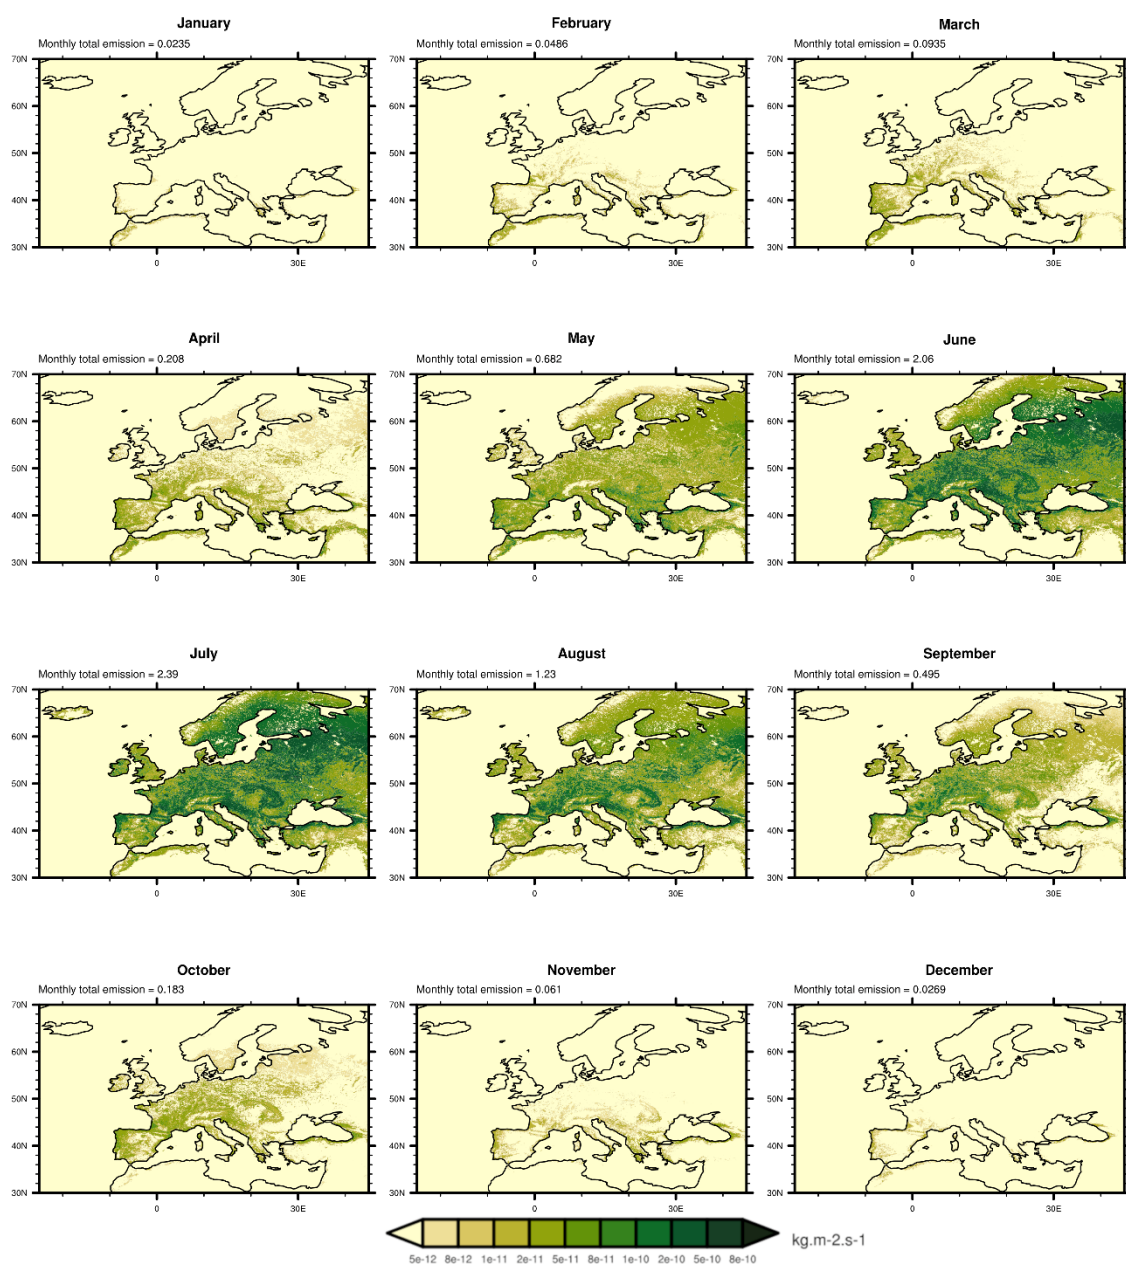

**Figure S4.** Maps of monthly mean isoprene emissions (units of  $\text{kg.m}^{-2}.\text{s}^{-1}$ ) calculated using the SURFEX-MEGAN3.0 algorithms and averaged over 2021 using the open-loop configuration of SURFEX. The panels show each month moving sequentially from January to December first from left to right and then downwards from top to bottom. The colour bars indicate increasing mean isoprene emissions as the colours transition from pale yellow to dark green. Note that the colour bar has a quasi-logarithmic scale. The monthly total mass of isoprene emissions (units of Tg) are shown above each plot.

## Monthly Mean Isoprene Emissions Over the CAMS European Domain for 2022 - Open Loop

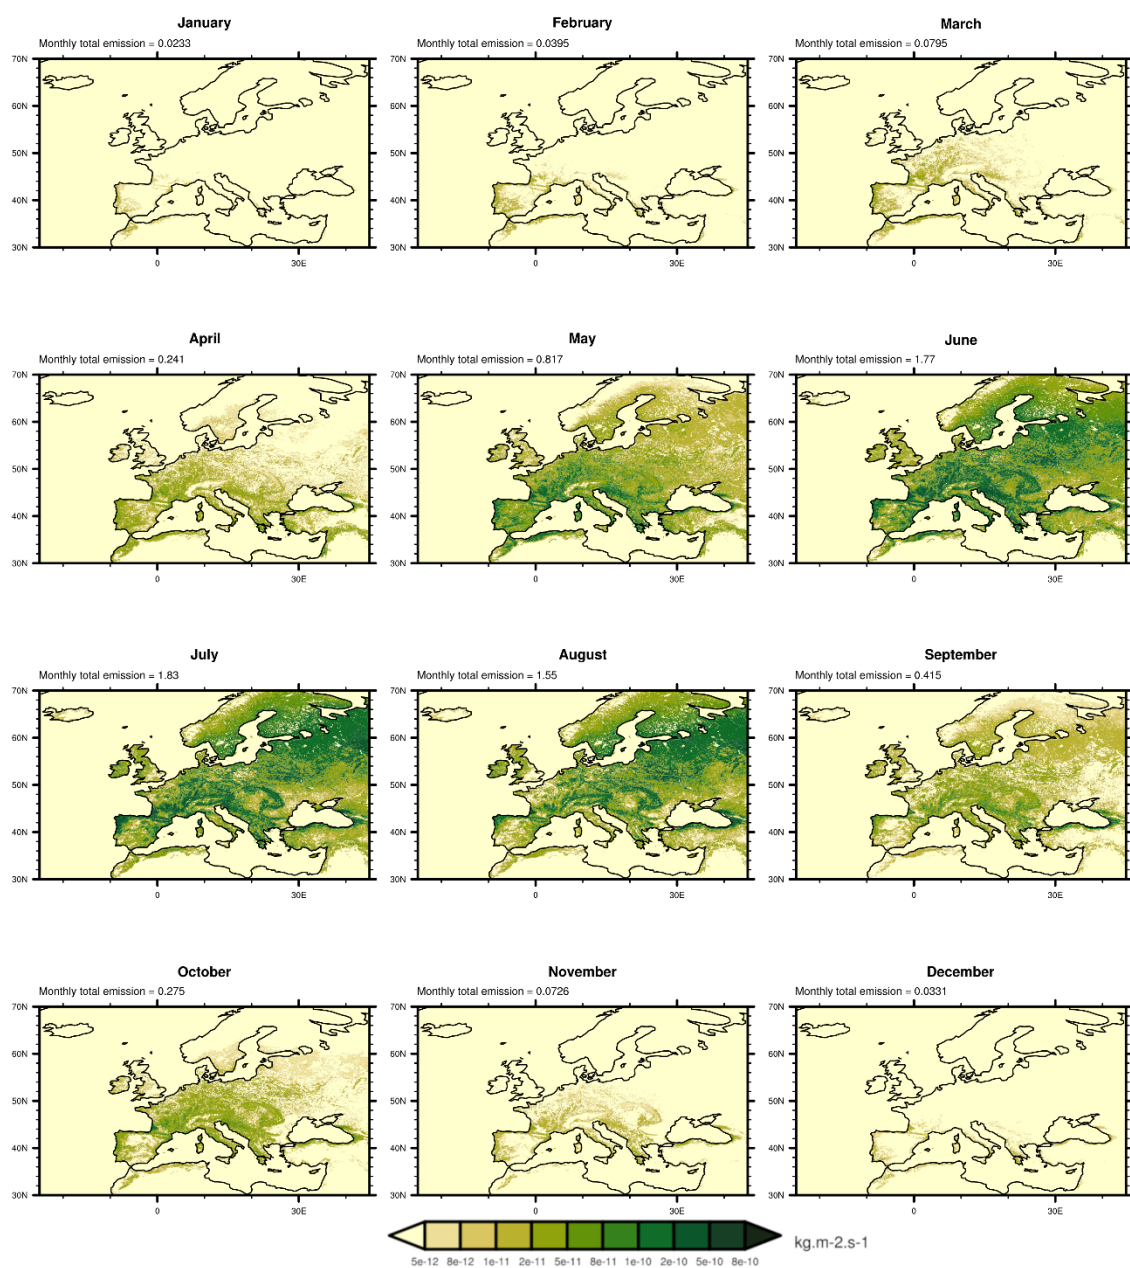

**Figure S5.** Maps of monthly mean isoprene emissions (units of  $\text{kg.m}^{-2}.\text{s}^{-1}$ ) calculated using the SURFEX-MEGAN3.0 algorithms and averaged over 2019 using the open-loop configuration of SURFEX. The panels show each month moving sequentially from January to December first from left to right and then downwards from top to bottom. The colour bars indicate increasing mean isoprene emissions as the colours transition from pale yellow to dark green. Note that the colour bar has a quasi-logarithmic scale. The monthly total mass of isoprene emissions (units of Tg) are shown above each plot.

## Monthly Mean Isoprene Emissions Over the CAMS European Domain for 2018 - LAI Analysis

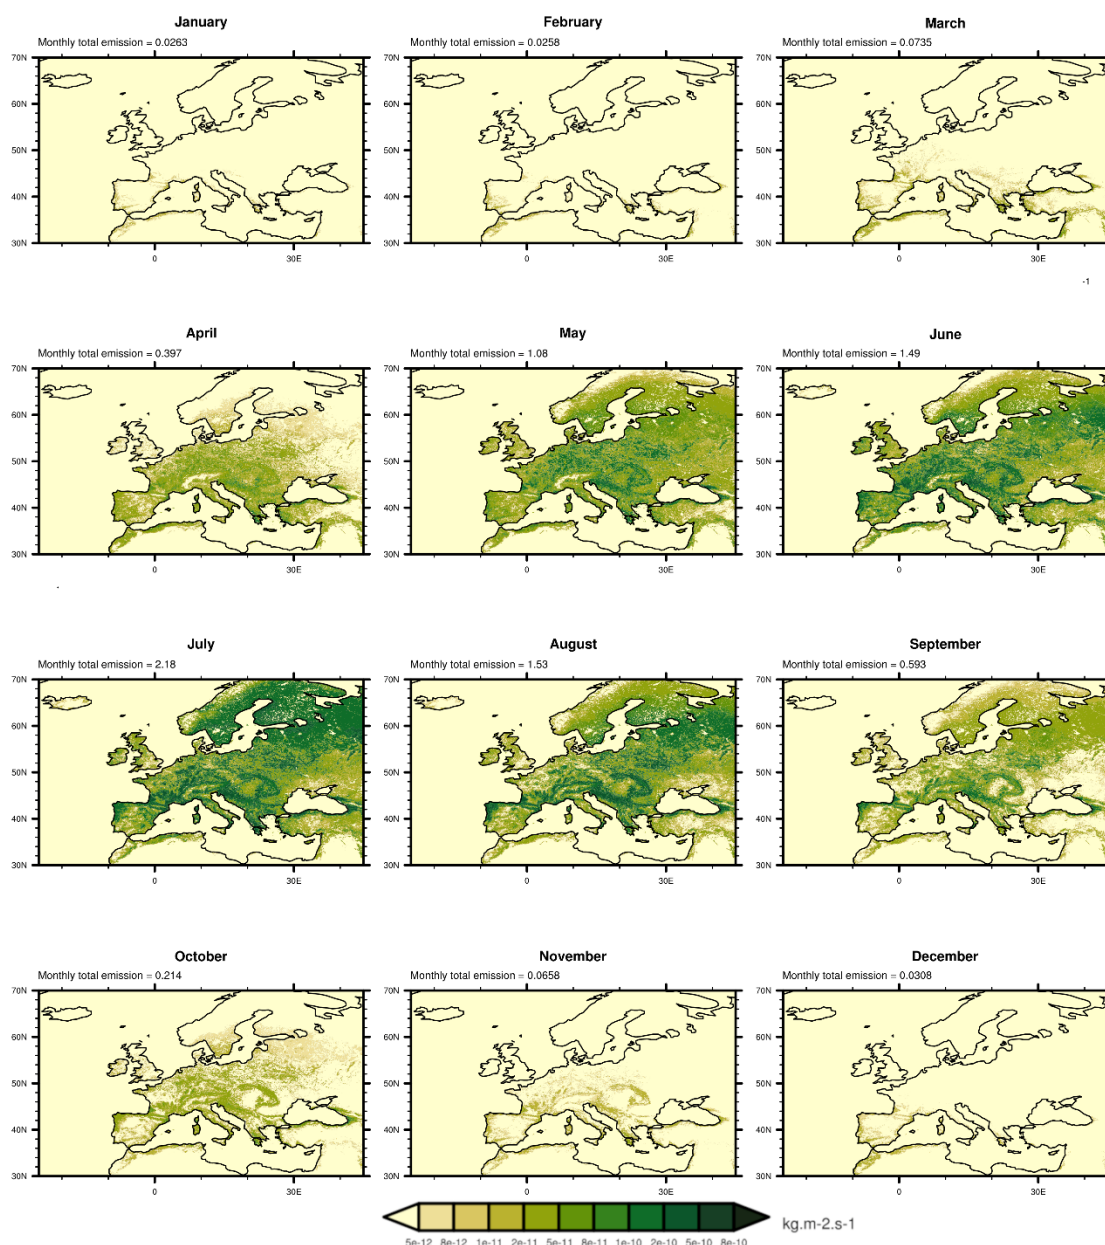

**Figure S6.** Maps of monthly mean isoprene emissions (units of  $\text{kg.m}^{-2}.\text{s}^{-1}$ ) calculated using the SURFEX-MEGAN3.0 algorithms and averaged over 2018 using the analysis configuration of SURFEX. The panels show each month moving sequentially from January to December first from left to right and then downwards from top to bottom. The colour bars indicate increasing mean isoprene emissions as the colours transition from pale yellow to dark green. Note that the colour bar has a quasi-logarithmic scale. The monthly total mass of isoprene emissions (units of Tg) are shown above each plot.

## Monthly Mean Isoprene Emissions Over the CAMS European Domain for 2019 - LAI Analysis

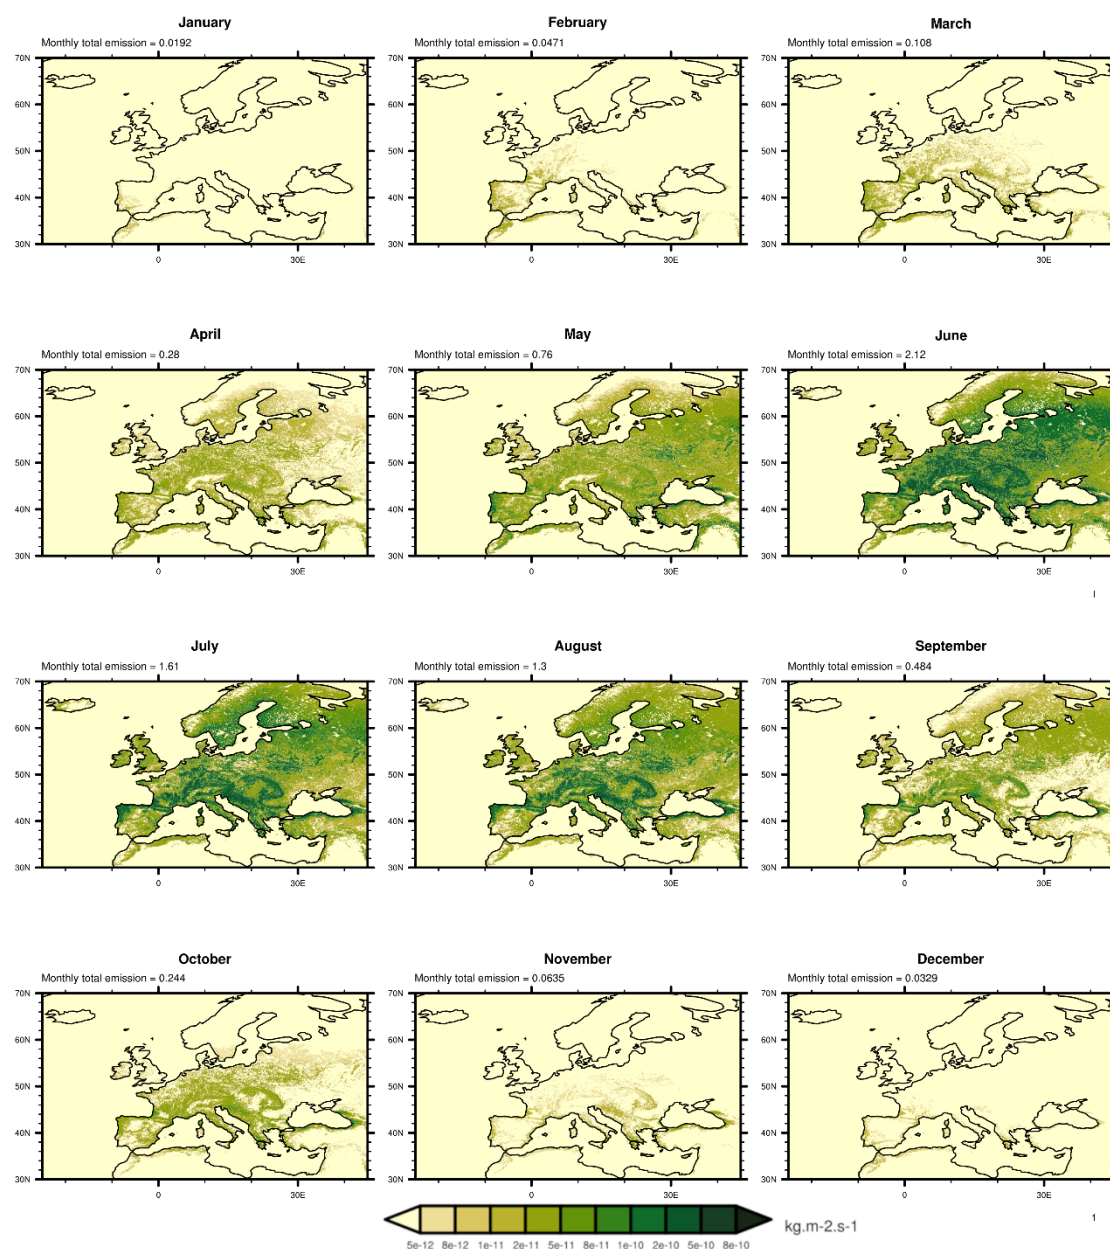

**Figure S7.** Maps of monthly mean isoprene emissions (units of  $\text{kg.m}^{-2}.\text{s}^{-1}$ ) calculated using the SURFEX-MEGAN3.0 algorithms and averaged over 2019 using the analysis configuration of SURFEX. The panels show each month moving sequentially from January to December first from left to right and then downwards from top to bottom. The colour bars indicate increasing mean isoprene emissions as the colours transition from pale yellow to dark green. Note that the colour bar has a quasi-logarithmic scale. The monthly total mass of isoprene emissions (units of Tg) are shown above each plot.



## Monthly Mean Isoprene Emissions Over the CAMS European Domain for 2020 - LAI Analysis

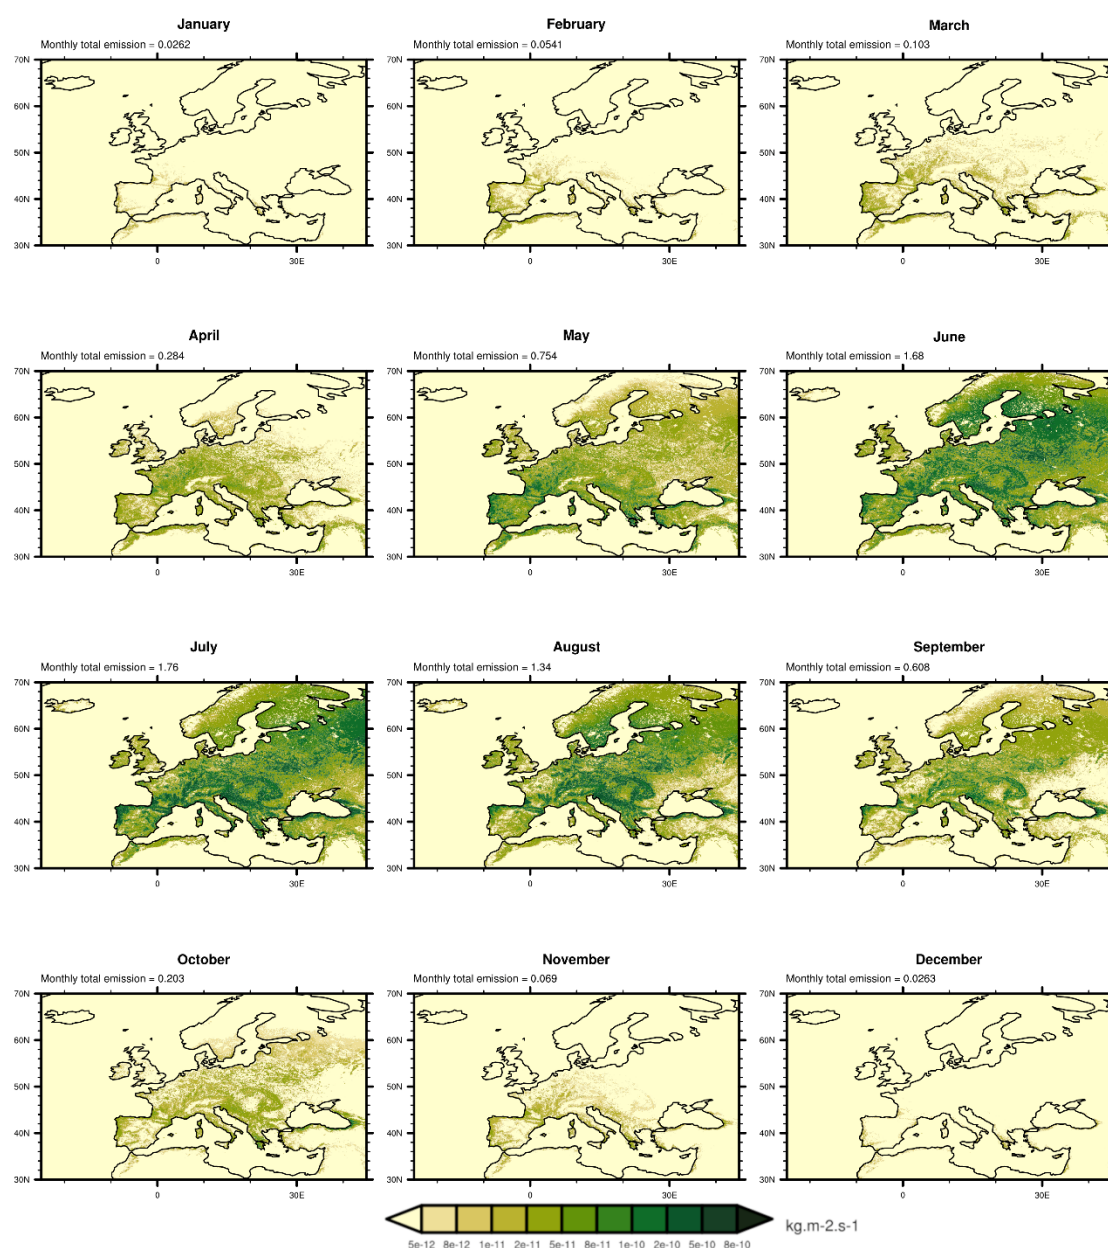

**Figure S8.** Maps of monthly mean isoprene emissions (units of  $\text{kg.m}^{-2}.\text{s}^{-1}$ ) calculated using the SURFEX-MEGAN3.0 algorithms and averaged over 2020 using the analysis configuration of SURFEX. The panels show each month moving sequentially from January to December first from left to right and then downwards from top to bottom. The colour bars indicate increasing mean isoprene emissions as the colours transition from pale yellow to dark green. Note that the colour bar has a quasi-logarithmic scale. The monthly total mass of isoprene emissions (units of Tg) are shown above each plot.

# Monthly Mean Isoprene Emissions Over the CAMS European Domain averaged over 2018-2020 - LAI Analysis

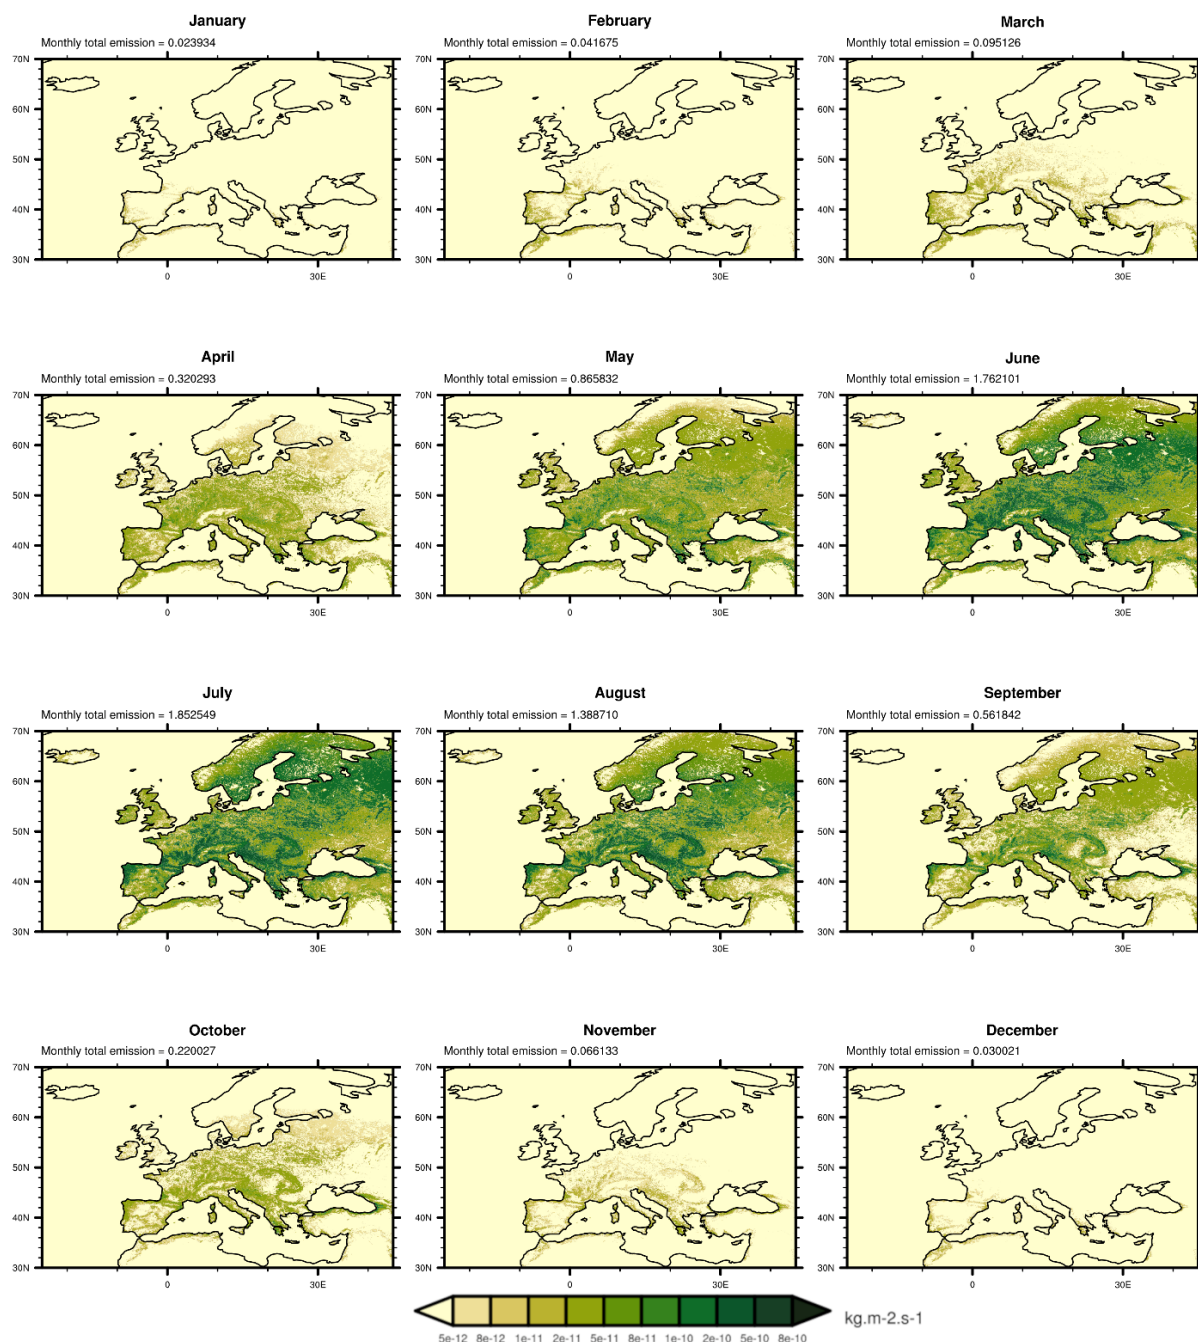

**Figure S9. Maps of monthly mean isoprene emissions (units of  $\text{kg.m}^{-2}.\text{s}^{-1}$ ) calculated using the SURFEX-MEGAN3.0 algorithms and averaged over 2020 using the analysis configuration of SURFEX. The panels show each month moving sequentially from January to December first from left to right and then downwards from top to bottom. The colour bars indicate increasing mean isoprene emissions as the colours transition from pale yellow to dark green. Note that the colour bar has a quasi-logarithmic scale. The monthly total mass of isoprene emissions (units of Tg) are shown above each plot.**
